# Supplementary material for: Non-invasive high frequency oscillation ventilation versus nasal CPAP as primary respiratory support in preterm neonates ≥ 30 weeks with RDS: A non-inferiority randomized controlled trial
Source: Research Square preprint supplement (doi:10.21203/rs.3.rs-8642181/v1), 2026-02-04
Supplement: Supplementary file 1 [file 0898aab588ea68b5ddab4236.docx]

**CONSORT Checklist for Non-inferiority Randomized Trials**

| **Item #** | **Checklist Item** | **Page number** |
| --- | --- | --- |
| 1a | Identification as a randomized trial in the title | 1 |
| 1b | Structured summary of trial design, methods, results, and conclusions | 2 |
| 2a | Scientific background and explanation of rationale | 5 |
| 2b | Specific objectives or hypotheses | 5 |
| 3a | Description of trial design (such as parallel, factorial) including allocation ratio | 5,8 |
| 3b | Important changes to methods after trial commencement (such as eligibility criteria), with reasons | Not applicable |
| 4a | Eligibility criteria for participants | 6 |
| 4b | Settings and locations where the data were collected | 5 |
| 5 | The interventions for each group with sufficient details to allow replication | 6,7 |
| 6a | Completely defined pre-specified primary and secondary outcome measures, including how and when they were assessed | 7 |
| 6b | Any changes to trial outcomes after the trial commenced, with reasons | 7 (one post hoc outcome) |
| 7a | How sample size was determined | 8 |
| 7b | When applicable, explanation of any interim analyses and stopping guidelines | Not applicable |
| 8a | Method used to generate the random allocation sequence | 8 |
| 8b | Type of randomization; details of any restriction (such as blocking and block size) | 8 |
| 9 | Mechanism used to implement the random allocation sequence (such as sequentially numbered containers), describing any steps taken to conceal the sequence until interventions were assigned | 8 |
| 10 | Who generated the random allocation sequence, who enrolled participants, and who assigned participants to interventions | 8 |
| 11a | If done, who was blinded after assignment to interventions (for example, participants, care providers, those assessing outcomes) and how | 8 |
| 11b | If relevant, description of the similarity of interventions | 6,7 |
| 12a | Statistical methods used to compare groups for primary and secondary outcomes | 8,9 |
| 12b | Methods for additional analyses, such as subgroup analyses and adjusted analyses | 8,9 |
| 13a | For each group, the numbers of participants who were randomly assigned, received intended treatment, and were analyzed for the primary outcome | 9, Figure 1 |
| 13b | For each group, losses and exclusions after randomization, together with reasons | Figure 1 |
| 14a | Dates defining the periods of recruitment and follow-up | 9 |
| 14b | Why the trial ended or was stopped | Not applicable |
| 15 | A table showing baseline demographic and clinical characteristics for each group | Table 1 |
| 16 | For each group, number of participants (denominator) included in each analysis and whether the analysis was by original assigned groups | Tables 2 and 3, Figure 1 |
| 17a | For each primary and secondary outcome, results for each group, and the estimated effect size and its precision (such as 95% confidence interval) | Tables 2 and 3 |
| 17b | For binary outcomes, presentation of both absolute and relative effect sizes is recommended | Tables 2 and 3 |
| 18 | Results of any other analyses performed, including subgroup analyses and adjusted analyses, distinguishing pre-specified from exploratory | 9 |
| 19 | All important harms or unintended effects in each group | Table 3 |
| 20 | Trial limitations, addressing sources of potential bias, imprecision, and multiplicity of analyses | 11 |
| 21 | Generalizability (external validity, applicability) of the trial findings | 11 |
| 22 | Interpretation consistent with results, balancing benefits and harms, and considering other relevant evidence | 10-12 |
| 23 | Registration number and name of trial registry | 5 |
| 24 | Where the full trial protocol can be accessed, if available | 5 |
| 25 | Sources of funding and other support (such as supply of drugs), role of funders | 18 |
| **Non-inferiority specific items** | | |
| NI-1 | Rationale for using a non-inferiority design | 5 |
| NI-2 | The non-inferiority margin and how it was determined | 8 |
| NI-3 | The analytic strategy (e.g., intention-to-treat, per-protocol) used to estimate the effect of treatment and handle protocol deviations | 9 |
| NI-4 | Results of the non-inferiority analysis, including the confidence interval for the difference between groups and whether the non-inferiority margin was met | Table 2, Figure 2 |
| NI-5 | Interpretation of the non-inferiority analysis, including the clinical relevance of the margin and the results | 10-12 |
